# Supplementary material for: Expanding global commodities trade and consumption place the world’s primates at risk of extinction
Source: PeerJ journal article supplement (doi:10.7717/peerj.7068), 2019-06-17
Supplement: Table_S1.docx [file Table_S1.docx]

| **Country** | **Deforestation 2001-2017** | **Permanent deforestation** |
| --- | --- | --- |
|  |  |  |
| **Neotropics** | **M ha** | **%** |
| Brazil | 51.00 | 66 |
| Argentina | 5.60 | 82 |
| Paraguay | 5.46 | 90 |
| Bolivia | 4.53 | 70 |
| Colombia | 3.72 | 22 |
| Mexico | 3.40 | 15 |
| Perú | 2.60 | 21 |
| Venezuela | 1.83 | 14 |
| Guatemala | 1.32 | 17 |
| Nicaragua | 1.32 | 5.6 |
| Honduras | 0.84 | 14 |
| Ecuador | 0.75 | 1.1 |
| Panama | 0.35 | 4.9 |
| Costa Rica | 0.22 | 1.3 |
| Belize | 0.21 | 34 |
| Guyana | 0.17 | 7.6 |
| Suriname | 0.15 | 12 |
| El Salvador | 0.07 | 2.5 |
| French Guiana | 0.07 | 26 |
| Trinidad | 0.02 | 7 |
| **Africa** |  |  |
| Democratic Republic of Congo | 12.00 | 3.6 |
| Mozambique | 2.88 | 0.54 |
| Angola | 2.45 | 1.3 |
| Ivory coast | 2.41 | 7.2 |
| Tanzania | 2.19 | 2.2 |
| Zambia | 1.44 | 2.9 |
| Liberia | 1.32 | 12.000 |
| South Africa | 1.28 | 5.6 |
| Sierra Leone | 1.19 | 7.1 |
| Guinea | 1.14 | 8.8 |
| Cameroon | 1.08 | 8.7 |
| Ghana | 0.94 | 6.1 |
| Nigeria | 0.74 | 15.000 |
| Centr African Republic | 0.70 | 0.54 |
| Uganda | 0.69 | 9.4 |
| Congo | 0.65 | 4.4 |
| Gabon | 0.38 | 5.1 |
| Ethiopia | 0.37 | 2.5 |
| **Kenya** | 0.31 | 20 |
| Zimbabwe | 0.19 | 0.82 |
| Malawi | 0.15 | 3.5 |
| Algeria | 0.15 | 16 |
| Guinea-Bissau | 0.13 | 9.200 |
| Equatorial Guinea | 0.10 | 15.000 |
| Swaziland | 0.09 | 0.58 |
| Togo | 0.04 | 0.21 |
| Chad | 0.03 | 0.1 |
| Morocco | 0.03 | 9.100 |
| Rwanda | 0.03 | 15 |
| Burundi | 0.02 | 17 |
| Senegal | 0.00 | 15 |
| Mali | 0.00 | 0 |
| Egipto | 0.00 | 3.2 |
| Namibia | 0.01 |  |
| Madagascar | 3.7 | 27 |
|  |  |  |
|  |  |  |
| **Asia (South Asia, Southeast Asia)** |  |  |
| Indonesia | 24.4 | 89 |
| China | 8.9 | 1.8 |
| Malaysia | 7.3 | 91 |
| Myanmar | 3.1 | 41 |
| Vietnam | 2.4 | 64 |
| Cambodia | 2.1 | 93 |
| Thailand | 1.8 | 36 |
| India | 1.5 | 2.3 |
| Philippines | 1.1 | 42 |
| Japan | 0.6 | 0.16 |
| Sri Lanka | 0.2 | 20 |
| Bangladesh | 0.1 | 6 |
| Nepal | 0.0426 | 15 |
| Brunei | 0.0255 | 43 |
| Timor-Leste | 0.0245 | 11 |
| Bhutan | 0.0185 | 54 |
| Pakistan | 0.0095 | 0 |
| Laos | 2.7100 | 0 |
