# Supplementary material for: Expanding global commodities trade and consumption place the world’s primates at risk of extinction
Source: PeerJ journal article supplement (doi:10.7717/peerj.7068), 2019-06-17
Supplement: Table_S2.docx [file Table_S2.docx]

|  | **G20 countries** |
| --- | --- |
| 1 | Argentina |
| 2 | Australia |
| 3 | Brazil |
| 4 | Canada |
| 5 | China |
| 6 | France |
| 7 | Germany |
| 8 | India |
| 9 | Indonesia |
| 10 | Italy |
| 11 | Japan |
| 12 | Korea, R |
| 13 | Mexico |
| 14 | Russian Federation |
| 15 | Saudi Arabia |
| 16 | South Africa |
| 17 | Turkey |
| 18 | UK |
| 19 | US |
| 20 | EU (28) |
