# Supplementary material for: Expanding global commodities trade and consumption place the world’s primates at risk of extinction
Source: PeerJ journal article supplement (doi:10.7717/peerj.7068), 2019-06-17
Supplement: Table_S3.docx [file Table_S3.docx]

|  | Country | $US bn |
| --- | --- | --- |
| 1 | Brazil | 87.8170 |
| 2 | India | 74.1596 |
| 3 | Indonesia | 71.3841 |
| 4 | Malaysia | 54.2760 |
| 5 | South Africa | 48.8440 |
| 6 | Mexico | 37.0060 |
| 7 | Vietnam | 34.3533 |
| 8 | Nigeria | 32.9006 |
| 9 | Venezuela | 28.0000 |
| 10 | Thailand | 27.3334 |
| 11 | Argentina | 23.8860 |
| 12 | Peru | 23.0330 |
| 13 | Colombia | 19.6210 |
| 14 | Bostwana | 7.3140 |
| 15 | Ecuador | 6.7130 |
| 16 | Ghana | 5.8097 |
| 17 | Myanmar | 5.2350 |
| 18 | Philippines | 4.8290 |
| 19 | Zambia | 4.7012 |
| 20 | Paraguay | 4.3000 |
| 21 | Guinea | 4.0000 |
| 22 | DRC | 3.7000 |
| 23 | Mali | 3.5000 |
| 24 | Congo Republic | 3.4640 |
| 25 | Brunei | 3.4000 |
| 26 | Guatemala | 1.9790 |
| 27 | Angola | 1.9000 |
| 28 | Pakistan | 1.5036 |
| 29 | Namibia | 1.1750 |
| 30 | Bolivia | 1.0000 |
| 31 | Cote´de Ivoire | 0.8500 |
| 32 | Madagascar. | 0.7915 |
| 33 | Nicaragua | 0.7912 |
| 34 | Panama | 0.7435 |
| 35 | Cameroon | 0.4377 |
| 36 | T & Tobago | 0.3980 |
| 37 | Stri Lanka | 0.3909 |
| 38 | Honduras | 0.3450 |
| 39 | Aghanistan | 0.3140 |
| 40 | Belize | 0.3140 |
| 41 | Mozambique | 0.2940 |
| 42 | Tanzania | 0.2720 |
| 43 | Equatorial Guinea | 0.2670 |
| 44 | Costa Rica | 0.2100 |
| 45 | Cambodia | 0.1880 |
| 46 | Niger | 0.1300 |
| 47 | Liberia | 0.1060 |
| 48 | Bangladesh | 0.0114 |
| 49 | Ethiopia | 0.0089 |
| 50 | Uganda | 0.0059 |
| 51 | Sudan | 0.0050 |
| 52 | Guyana | 0.0030 |
| 53 | Togo | 0.0021 |
| 54 | Nepal | 0.0008 |
| 55 | Bhutan | 0.0002 |
|  |  |  |
|  | **Total** | **$US634 bn** |
