# Supplementary material for: Expanding global commodities trade and consumption place the world’s primates at risk of extinction
Source: PeerJ journal article supplement (doi:10.7717/peerj.7068), 2019-06-17
Supplement: Table_S4.docx [file Table_S4.docx]

|  | Country | $US bn |
| --- | --- | --- |
| 1 | China | 177.4006 |
| 2 | US | 87.3172 |
| 3 | India | 48.1090 |
| 4 | Japan | 36.1181 |
| 5 | Switzerland | 25.2008 |
| 6 | Korea, R | 19.7250 |
| 7 | Singapore | 13.8000 |
| 8 | Spain | 8.8167 |
| 9 | UAE | 8.6740 |
| 10 | Belgium | 6.3250 |
| 11 | France | 4.0570 |
| 12 | The Netherlands | 4.0190 |
| 13 | Malaysia | 2.4170 |
| 14 | Vietnam | 1.8290 |
| 15 | Pakistan | 1.8054 |
| 16 | Gilbraltar | 1.7000 |
| 17 | Turkey | 1.5060 |
| 18 | Israel | 1.1000 |
| 19 | Germany | 1.0586 |
| 20 | Egypt | 1.0240 |
| 21 | Italy | 0.8710 |
| 22 | Russian Federation | 0.7830 |
| 23 | Canada | 0.4014 |
| 24 | Saudi Arabia | 0.3159 |
| 25 | Colombia | 0.1630 |
| 26 | Senegal | 0.0810 |
| 27 | Norway | 0.0530 |
| 28 | Indonesia | 0.0520 |
| 29 | South Africa | 0.0501 |
| 30 | UK | 0.0470 |
| 31 | Burkina Fasso | 0.0350 |
| 32 | Mali | 0.0320 |
| 33 | DRC | 0.0300 |
| 34 | Kwait | 0.0290 |
| 35 | Australia | 0.0200 |
| 36 | Brazil | 0.0106 |
| 37 | Mexico | 0.0103 |
| 38 | Sierra Leone | 0.0070 |
| 39 | Argentina | 0.0049 |
| 40 | Poland | 0.0040 |
| 41 | Thailand | 0.0035 |
| 42 | Mauritious | 0.0001 |
|  |  |  |
|  | **Total** | **$US 455 bn** |
