# Supplementary material for: Expanding global commodities trade and consumption place the world’s primates at risk of extinction
Source: PeerJ journal article supplement (doi:10.7717/peerj.7068), 2019-06-17
Supplement: Table_S5.docx [file Table_S5.docx]

| Neotropics | Species | Threatened | % species threatened | **GDPPC 2017** |
| --- | --- | --- | --- | --- |
| Trinidad | 1 | 0 | 0 | 28,763 |
| Argentina | 5 | 0 | 0 | 18,934 |
| French Guiana | 7 | 1 | 14 | 19,828 |
| Panama | 8 | 4 | 50 | 22,267 |
| Venezuela | 17 | 5 | 29 | NA |
| Mexico | 3 | 2 | 67 | 17,336 |
| Suriname | 7 | 1 | 14 | 13,767 |
| Brazil | 116 | 39 | 34 | 14,103 |
| Costa Rica | 5 | 2 | 40 | 15,525 |
| Colombia | 37 | 18 | 49 | 13,255 |
| Peru | 44 | 11 | 25 | 12,237 |
| Ecuador | 20 | 6 | 30 | 10,582 |
| Belize | 2 | 2 | 100 | 7,824 |
| Paraguay | 5 | 0 | 0 | 8,827 |
| El Salvador | 1 | 1 | 100 | 7,292 |
| Guatemala | 3 | 2 | 67 | 7,424 |
| Bolivia | 24 | 5 | 21 | 6,886 |
| Nicaragua | 4 | 1 | 25 | 5,321 |
| Honduras | 3 | 1 | 33 | 4,542 |
| Guyana | 7 | 1 | 14 | 7,435 |

| Africa | Species | Threatened | % of species threatened | GDPPPC 2017 |
| --- | --- | --- | --- | --- |
| Algeria | 1 | 0 | 0 | 13,914 |
| Equatorial Guinea | 25 | 9 | 36 | 22,605 |
| Gabon | 20 | 6 | 30 | 19,264 |
| Botswana | 3 | 0 | 0 | 16,562 |
| South Africa | 5 | 0 | 0 | 12,295 |
| Egypt | 1 | 0 | 0 | 10,550 |
| Tunisia | 1 | 0 | 0 | 10,849 |
| Namibia | 3 | 0 | 0 | 9,542 |
| Angola | 19 | 2 | 11 | 5,819 |
| Morocco | 1 | 1 | 100 | 7,485 |
| Congo | 23 | 5 | 22 | 4,881 |
| Nigeria | 26 | 11 | 42 | 5,338 |
| Sudan | 6 | 0 | 0 | 4,467 |
| Ghana | 16 | 5 | 31 | 4,228 |
| Zambia | 10 | 0 | 0 | 3,689 |
| Cote d'Ivoire | 17 | 6 | 35 | 3,601 |
| Mauritania | 3 | 0 | 0 | 3,598 |
| Swaziland | 5 | 0 | 0 | 3,034 |
| Djibouti | 2 | 0 | 0 | 2,999 |
| Cameroon | 32 | 9 | 28 | 3,365 |
| Kenya | 19 | 1 | 5 | 2,993 |
| Lesotho | 1 | 0 | 0 | 2,851 |
| Tanzania | 26 | 6 | 23 | 2,683 |
| Senegal | 11 | 3 | 27 | 2,471 |
| Chad | 5 | 0 | 0 | 1,768 |
| South Sudan | 11 | 1 | 9 | 2,030 |
| Zimbabwe | 6 | 0 | 0 | 1,900 |
| Benin | 12 | 3 | 25 | 2,064 |
| Burkina Faso | 8 | 2 | 25 | 1,703 |
| Uganda | 20 | 3 | 15 | 1,698 |
| Gambia | 7 | 2 | 29 | 1,562 |
| Mali | 7 | 1 | 14 | 2,014 |
| Sierra Leone | 15 | 5 | 33 | 1,390 |
| Rwanda | 17 | 4 | 24 | 1,854 |
| Madagascar | 103 | 90 | 87 | 1,416 |
| Guinea-Bissau | 10 | 4 | 40 | 1,549 |
| Togo | 13 | 3 | 23 | 1,430 |
| Ethiopia | 13 | 1 | 8 | 1,730 |
| Guinea | 14 | 5 | 36 | 1,999 |
| Eritrea | 4 | 0 | 0 | 1,196 |
| Mozambique | 9 | 0 | 0 | 1,136 |
| Niger | 4 | 0 | 0 | 926 |
| Liberia | 12 | 5 | 42 | 753 |
| Congo DR | 49 | 7 | 14 | 808 |
| Malawi | 8 | 0 | 0 | 1,095 |
| Burundi | 13 | 2 | 15 | 702 |
| Centr Afric Rep | 19 | 2 | 11 | 661 |
| Somalia | 9 | 0 | 0 | 600 |

| South Asia | Species | Threatened | % of species threatened | GDPPC 2017 |
| --- | --- | --- | --- | --- |
| S. Arabia | 1 | 0 | 0 | 49,045.0 |
| Sri Lanka | 5 | 3 | 60 | 9,500.0 |
| India | 22 | 12 | 55 | 6,427.0 |
| Pakistan | 2 | 0 | 0 | 5,035.0 |
| Yemen | 1 | 0 | 0 | 3,959.0 |
| Bangladesh | 9 | 6 | 67 | 3,524.0 |
| Nepal | 4 | 0 | 0 | 2,443.0 |
| Afghanistan | 1 | 0 | 0 | 1,804.0 |

| Southeast Asia | Species | Threatened | % of species threatened | GDPPC 2017 |
| --- | --- | --- | --- | --- |
| Singapore | 3 | 1 | 33 | 85,535.0 |
| Brunei | 9 | 7 | 78 | 71,809.0 |
| Taiwan | 1 | 0 | 0 | 46,000.0 |
| Japan | 1 | 0 | 0 | 39,002.0 |
| Malaysia | 20 | 14 | 70 | 26,808.0 |
| Thailand | 18 | 11 | 61 | 16,278.0 |
| China | 20 | 16 | 80 | 15,309.0 |
| Indonesia | 56 | 38 | 68 | 11,189.0 |
| Bhutan | 6 | 2 | 33 | 8,709.0 |
| Philippines | 3 | 1 | 33 | 7,599.0 |
| Vietnam | 22 | 19 | 86 | 6,172.0 |
| Laos | 18 | 15 | 83 | 6,397.0 |
| Myanmar | 17 | 11 | 65 | 5,592.0 |
| Cambodia | 10 | 9 | 90 | 5,592.0 |
| Timor-Leste | 1 | 0 | 0 | 6,570.0 |
