# Supplementary material for: Expanding global commodities trade and consumption place the world’s primates at risk of extinction
Source: PeerJ journal article supplement (doi:10.7717/peerj.7068), 2019-06-17
Supplement: Table_S6.docx [file Table_S6.docx]

|  | **Exporter country** | **$US bn (2016)** | **FSI (2018)** | **GDPPC (2017)** | **CPI (2018)** |
| --- | --- | --- | --- | --- | --- |
| 1 | Brazil | 87.817 | 68.4 | 14,103 | 35 |
| 2 | India | 74.160 | 50.1 | 6,427 | 41 |
| 3 | Indonesia | 71.384 | 54.8 | 11,189 | 38 |
| 4 | Malaysia | 54.276 | 68.1 | 26,808 | 47 |
| 5 | South Africa | 48.844 | 65.5 | 12,295 | 43 |
| 6 | Mexico | 37.006 | 66.4 | 17,336 | 28 |
| 7 | Vietnam | 34.353 | 56.0 | 6,172 | 33 |
| 8 | Nigeria | 32.901 | 38 | 5,338 | 27 |
| 9 | Venezuela | 28.000 | 47.4 | NA | 18 |
| 10 | Thailand | 27.333 | 58.9 | 16,278 | 36 |
| 11 | Argentina | 23.886 | 69.2 | 18,934 | 40 |
| 12 | Peru | 23.033 | 58.7 | 12,237 | 35 |
| 13 | Colombia | 19.621 | NA | 13,255 | 36 |
| 14 | Bostwana | 7.314 | 60.8 | 16,562 | 61 |
| 15 | Ecuador | 6.713 | 54.8 | 10,582 | 34 |
| 16 | Ghana | 5.810 | 50.9 | 4,228 | 41 |
| 17 | Myanmar | 5.235 | 45.7 | 5,592 | 29 |
| 18 | Philippines | 4.829 | 51.5 | 7,599 | 36 |
| 19 | Zambia | 4.701 | 33.7 | 3,689 | 35 |
| 20 | Paraguay | 4.300 | 57.2 | 8,827 | 29 |
| 21 | Guinea | 4.000 | 34.9 | 1,999 | 16 |
| 22 | DRC | 3.700 | 26.1 | 808 | 20 |
| 23 | Mali | 3.500 | 42 | 2,014 | 32 |
| 24 | Congo Republic | 3.464 | NA | 4,881 | 19 |
| 25 | Brunei | 3.400 | NA | 71,809 | 63 |
| 26 | Guatemala | 1.979 | 51.4 | 7,424 | 27 |
| 27 | Angola | 1.900 | 38.6 | 5,819 | 19 |
| 28 | Pakistan | 1.504 | 49.1 | 5,035 | 33 |
| 29 | Namibia | 1.175 | NA | 9,542 | 53 |
| 30 | Bolivia | 1.000 | 50.7 | 6,886 | 29 |
| 31 | Cote´de Ivoire | 0.850 | 45.8 | 3,601 | 35 |
| 32 | Madagascar. | 0.792 | 27 | 1,416 | 25 |
| 33 | Nicaragua | 0.791 | 51.1 | 5,321 | 25 |
| 34 | Panama | 0.744 | 61.9 | 22,267 | 37 |
| 35 | Cameroon | 0.438 | 42.4 | 3,365 | 25 |
| 36 | T & Tobago | 0.398 | NA | 28,763 | 41 |
| 37 | Stri Lanka | 0.391 | 54.3 | 9,500 | 38 |
| 38 | Honduras | 0.345 | 50.7 | 4,542 | 29 |
| 39 | Aghanistan | 0.314 | NA | 1,804 | 16 |
| 40 | Belize | 0.314 | NA | 7,824 | NA |
| 41 | Mozambique | 0.294 | 35 | 1,136 | 23 |
| 42 | Tanzania | 0.272 | 37.1 | 2,683 | 36 |
| 43 | Equatorial Guinea | 0.267 | NA | 22,605 | 16 |
| 44 | Costa Rica | 0.210 | 69.3 | 15,525 | 56 |
| 45 | Cambodia | 0.188 | 42.3 | 5,592 | 20 |
| 46 | Niger | 0.130 | NA | 926 | 34 |
| 47 | Liberia | 0.106 | NA | 753 | 32 |
| 48 | Bangladesh | 0.011 | 43.3 | 3,524 | 26 |
| 49 | Ethiopia | 0.009 | 36 | 1,730 | 34 |
| 50 | Uganda | 0.006 | 41.4 | 1,698 | 26 |
| 51 | Sudan | 0.005 | 36.4 | 4,467 | 16 |
| 52 | Guyana | 0.003 | NA | 7,435 | 37 |
| 53 | Togo | 0.002 | 38.4 | 1,430 | 30 |
| 54 | Nepal | 0.001 | 46 | 2,443 | 31 |
| 55 | Bhutan | 0.0002 | NA | 8,709 | 68 |
