# Supplementary material for: Expanding global commodities trade and consumption place the world’s primates at risk of extinction
Source: PeerJ journal article supplement (doi:10.7717/peerj.7068), 2019-06-17
Supplement: Table_S7.docx [file Table_S7.docx]

|  |  | | |  |  |
| --- | --- | --- | --- | --- | --- |
|  | **Importer Country 2016** | **$US bn** | **FSI 2018** | **GDPPC 2017** | **CPI 2018** |
| 1 | China | 177.40 | 65.10 | $8,827.00 | 39 |
| 2 | US | 87.32 | 85.00 | $59,531.70 | 71 |
| 3 | India | 48.11 | 50.10 | $4,471.00 | 41 |
| 4 | Japan | 36.12 | 79.90 | $38,428.10 | 73 |
| 5 | Switzerland | 25.20 | 83.50 | $80,189.70 | 85 |
| 6 | Korea, R | 19.73 | 75.60 | $29,742.80 | 57 |
| 7 | Singapore | 13.80 | 85.90 | $57,714.30 | 85 |
| 8 | Spain | 8.82 | 78.00 | $28,156.80 | 58 |
| 9 | UAE | 8.67 | 72.50 | $40,698.80 | 70 |
| 10 | Belgium | 6.33 | 80.20 | $43,323.80 | 75 |
| 11 | France | 4.06 | 82.90 | $38,606.00 | 72 |
| 12 | The Netherlands | 4.02 | 84.70 | $48,473.00 | 82 |
| 13 | Malaysia | 2.42 | 68.10 | $26,808.00 | 47 |
| 14 | Vietnam | 1.83 | 56.00 | $6,172.00 | 33 |
| 15 | Pakistan | 1.81 | 49.10 | $5,035.00 | 33 |
| 16 | Gilbraltar | 1.70 | NA | NA | na |
| 17 | Turkey | 1.51 | 64.10 | $25,129.00 | 41 |
| 18 | Israel | 1.10 | 78.60 | $33,132.00 | 61 |
| 19 | Germany | 1.06 | 82.70 | $45,229.00 | 80 |
| 20 | Egypt | 1.02 | 56.30 | $10,550.00 | 35 |
| 21 | Italy | 0.87 | 76.30 | $35,220.00 | 52 |
| 22 | Russian Federation | 0.78 | 67.00 | $24,766.00 | 28 |
| 23 | Canada | 0.40 | 83.20 | $44,018.00 | 81 |
| 24 | Saudi Arabia | 0.32 | 72.40 | $49,045.00 | 49 |
| 25 | Colombia | 0.16 | 63.70 | $13,225.00 | 36 |
| 26 | Senegal | 0.08 | 41.90 | $2,471.00 | 45 |
| 27 | Norway | 0.05 | 82.20 | $64,800.00 | 84 |
| 28 | Indonesia | 0.05 | 54.80 | $11,189.00 | 38 |
| 29 | South Africa | 0.05 | 65.50 | $12,295.00 | 43 |
| 30 | UK | 0.05 | 85.00 | $39,753.00 | 80 |
| 31 | Burkina Fasso | 0.04 | 37.90 | $1,703.00 | 41 |
| 32 | Mali | 0.03 | 42.00 | $2,014.00 | 32 |
| 33 | DRC | 0.03 | 26.10 | $808.00 | 20 |
| 34 | Kwait | 0.03 | 74.80 | $65,531.00 | 41 |
| 35 | Australia | 0.02 | 83.70 | $44,649.00 | 77 |
| 36 | Brazil | 0.01 | 68.40 | $14,103.00 | 35 |
| 37 | Mexico | 0.01 | 66.40 | $17,336.00 | 28 |
| 38 | Sierra Leone | 0.01 | 29.20 | $1,390.00 | 30 |
| 39 | Argentina | 0.0049 | 69.20 | $18,934.00 | 40 |
| 40 | Poland | 0.0040 | 75.40 | $27,216.00 | 60 |
| 41 | Thailand | 0.0035 | 58.90 | $16,278.00 | 36 |
| 42 | Mauritious | 0.0001 | NA | $20,293.00 | 51 |
