# Supplementary material for: Expanding global commodities trade and consumption place the world’s primates at risk of extinction
Source: PeerJ journal article supplement (doi:10.7717/peerj.7068), 2019-06-17
Supplement: Table_S8.xlsx [file Table_S8.xlsx]

## Sheet: Table S8 Projected %extinctions
		Table S8: % of primate species threatened with extinction currently (2016) and under six future scenarios for 2050 and 2100.
Country	Total primates	# threatened with extinction	% threatened in 2016	% threatened in 2050_SSP1 RCP2.6	2050_SSP2 RCP 4.5	2050_SSP3 RCP7.0	2050_SSP4 RCP3.4	2050_SSP-4 RCP6.0	2050_SSP5 RCP8.5	% threatened in 2100_SSP1 RCP2.6	2100_SSP2 RCP 4.5	2100_SSP3 RCP7.0	2100_SSP4 RCP3.4	2100_SSP-4 RCP6.0	2100_SSP5 RCP8.5
Madagascar	103	90	87.3786	87.3786	100	92.7997	100	100	100	92.7358	100	100	100	100	100
Brazil	116	39	33.6207	33.6207	44.275	37.7677	40.3123	36.9282	38.1534	41.3242	50.7697	43.3932	46.9526	38.2403	42.6482
Indonesia	56	38	67.8571	67.8571	76.059	73.1713	77.6157	84.7829	77.8612	80.2757	96.4726	79.6026	90.6001	100	100
China	25	20	80	80	86.0256	83.8856	84.8414	87.4379	85.902	85.9373	97.299	89.8179	90.7129	100	100
Vietnam	22	19	86.3636	86.3636	98.6006	94.1599	96.2335	100	100	100	100	100	100	100	100
Colombia	37	18	48.6486	48.6486	50.2213	50.0059	50.0638	51.0893	50.6502	51.8385	52.3372	53.6877	54.2562	55.1091	53.5612
Laos	18	15	83.3333	83.3333	100	100	100	100	100	100	100	100	100	100	100
Malaysia	20	14	70	70	83.3186	78.8806	91.7427	94.735	85.2221	78.5885	100	88.765	100	100	100
India	22	12	54.5455	54.5455	72.4266	64.8381	72.625	72.6556	74.3933	70.8054	74.6429	71.2137	73.6775	71.2402	76.7502
Myanmar	17	11	64.7059	64.7059	88.6298	73.1996	78.1937	87.9455	78.5073	72.2737	100	82.6257	90.3976	100	100
Nigeria	26	11	42.3077	42.3077	45.3093	43.5014	46.769	46.3973	45.6336	45.5395	47.7187	43.915	50.1319	50.6872	50.6289
Peru	44	11	25	25	26.494	26.1836	34.2533	27.3047	26.9563	28.3347	28.634	28.3526	46.8205	31.0012	29.5753
Thailand	18	11	61.1111	61.1111	75.3158	70.1038	72.208	82.9025	73.7663	73.8844	84.5077	77.8894	80.9986	100	85.4236
Cambodia	10	9	90	90	100	98.4551	100	100	100	100	100	100	100	100	100
Cameroon	32	9	28.125	28.125	42.7984	30.2066	41.3874	39.7837	38.6012	33.431	54.031	33.3726	72.4886	73.425	69.2511
Equatorial Guinea	25	9	36	36	57.2433	38.8054	67.0551	54.4488	53.054	42.3271	75.0226	44.5617	100	100	100
Brunei	9	7	77.7778	77.7778	89.4826	85.5188	91.9953	95.5817	90.6447	87.4181	100	91.4871	100	100	100
Congo Democratic Republic	49	7	14.2857	14.2857	29.0536	16.2898	24.0066	24.939	23.5529	19.479	35.2673	18.5859	69.8326	66.1781	52.924
Bangladesh	9	6	66.6667	66.6667	66.3485	69.0964	67.9391	68.4398	68.2987	68.2336	67.6167	69.2308	68.1937	69.3465	69.656
Ecuador	20	6	30	30	31.9844	31.153	32.9551	31.4266	31.5414	32.1859	34.0882	34.1185	41.7402	34.3419	34.3228
Gabon	20	6	30	30	41.5507	32.2943	65.0703	48.6744	47.3097	36.2673	53.3303	35.2051	100	100	100
Ivory coast	17	6	35.2941	35.2941	40.0936	36.755	43.3244	41.3905	40.447	41.6553	42.9157	38.3672	44.641	44.9346	44.9151
Tanzania	26	6	23.0769	23.0769	33.5767	24.7783	34.0938	32.2939	31.0504	26.826	38.6867	26.6154	53.2855	56.7562	55.4229
Bolivia	24	5	20.8333	20.8333	22.4737	21.4914	23.6716	24.3409	22.3694	26.022	23.4914	23.977	28.1532	29.8492	24.046
Congo Republic	23	5	21.7391	21.7391	42.2878	24.5938	47.0881	37.9212	36.3857	29.8184	55.0834	27.8592	100	100	93.1316
Ghana	16	5	31.25	31.25	33.6447	32.0394	35.2726	34.7629	34.0153	35.0265	34.8607	32.7152	36.1775	36.6988	36.6927
Guinea	14	5	35.7143	35.7143	45.2257	40.0017	53.958	54.3138	51.9539	50.4873	52.9477	45.7334	55.1907	58.3722	58.2794
Liberia	12	5	41.6667	41.6667	60.2912	46.156	70.2765	57.9132	56.3421	60.42	71.8374	51.4875	76.6097	73.5484	73.4299
Sierra Leone	15	5	33.3333	33.3333	46.4417	37.5347	55.2034	48.4772	46.8343	48.2623	54.8662	42.2175	59.803	58.3057	58.2535
Venezuela	17	5	29.4118	29.4118	30.8777	30.9233	30.5089	35.2477	31.7014	36.9867	32.1638	35.7306	32.5733	42.1302	33.5743
Guinea-Bissau	10	4	40	40	53.0848	47.5758	66.7123	64.6087	61.3249	59.2402	61.2601	53.8833	74.9938	72.853	72.9952
Panama	8	4	50	50	53.7869	52.8718	53.5493	56.595	56.0424	57.7085	57.9115	56.5453	58.2739	62.5648	61.7809
Rwanda	17	4	23.5294	23.5294	27.4996	24.5939	28.453	28.7116	28.1778	25.7733	29.2924	25.6653	34.7267	35.3202	35.0605
Benin	12	3	25	25	30.9192	27.2844	32.8155	33.1516	31.2952	33.6335	35.2385	28.6023	35.8682	37.8393	37.835
Senegal	11	3	27.2727	27.2727	35.2184	30.7734	38.7305	38.9837	36.6342	38.8319	41.2616	33.2079	44.2114	45.7922	45.4126
Sri Lanka	5	3	60	60	72.1187	70.7564	73.2225	75.1943	74.6147	72.7275	72.1467	72.8448	74.1033	83.7429	75.726
Togo	13	3	23.0769	23.0769	26.5527	24.3078	28.1831	28.1254	26.9991	28.3251	28.7889	25.2157	30.0481	31.0269	31.0248
Uganda	20	3	15	15	17.8657	16.0935	18.2125	18.3412	18.0262	17.0628	19.0445	16.8662	21.1963	21.6941	21.4914
Angola	19	2	10.5263	10.5263	13.4338	10.9918	17.2714	16.8885	16.0959	12.9807	14.9351	12.1952	26.4736	37.8219	26.3237
Belize	2	2	100	100	100	100	100	100	100	100	100	100	100	100	100
Bhutan	6	2	33.3333	33.3333	46.1725	42.0187	45.0135	46.324	46.341	43.0695	48.3884	47.0389	46.8592	47.2118	48.2813
Burkina Faso	8	2	25	25	31.5148	27.6359	32.6994	33.0973	31.2692	34.2716	36.6722	28.9123	35.3802	37.6336	37.5153
Burundi	13	2	15.3846	15.3846	19.5378	16.3724	20.8704	21.328	20.679	17.5102	21.4629	17.5217	29.1341	30.7851	29.909
Central African Republic	19	2	10.5263	10.5263	16.2863	12.8762	17.9682	22.3916	21.1938	16.8872	21.3764	14.468	45	55.0931	45.996
Costa Rica	5	2	40	40	45.0795	43.4567	44.9388	46.6209	46.4524	46.8995	51.286	46.9895	51.2139	55.1592	54.6327
Gambia	7	2	28.5714	28.5714	37.4604	33.2391	44.756	43.8901	41.5412	41.562	43.3336	36.8494	49.9708	49.7544	49.8238
Guatemala	3	2	66.6667	66.6667	80.2664	75.81	80.5764	81.6875	81.799	81.2387	84.6988	82.1991	83.3544	86.1755	85.7071
Mexico	3	2	66.6667	66.6667	76.4946	74.5702	76.0732	81.9162	77.8173	77.5125	76.966	77.6892	77.5683	100	80.4036
El Salvador	1	1	100	100	100	100	100	100	100	100	100	100	100	100	100
Ethiopia	13	1	7.69231	7.69231	12.6749	10.6222	14.095	13.417	12.844	12.1176	14.0748	12.0946	14.1643	14.2252	14.0013
French Guiana	7	1	14.2857	14.2857	17.0495	16.4066	16.8735	17.4107	17.8078	19.5081	22.0147	20.4778	21.0336	20.8142	21.6792
Guyana	7	1	14.2857	14.2857	21.0971	16.6615	17.5862	17.4964	17.7226	19.7207	24.3583	19.9752	20.6425	21.6627	20.6961
Honduras	3	1	33.3333	33.3333	39.2568	37.523	39.2102	40.4052	40.2636	41.1384	43.8413	40.8574	43.2983	47.1764	46.1051
Kenya	19	1	5.26316	5.26316	7.66238	6.57053	8.14779	7.77932	7.49478	7.18983	8.6922	7.32185	9.70092	9.76416	9.65968
Mali	7	1	14.2857	14.2857	18.5598	17.114	20.4262	20.5482	19.6113	20.1976	23.7312	19.5415	26.424	26.1407	25.0761
Morocco	1	1	100	100	100	100	100	98.5499	100	100	100	100	100	98.3092	100
Nicaragua	4	1	25	25	28.089	27.226	27.9917	29.1107	28.9747	29.6037	31.5872	29.337	31.454	34.6865	33.7431
Philippines	3	1	33.3333	33.3333	37.7116	35.9167	37.1701	41.2333	38.3596	39.4898	43.7781	38.4159	41.5079	46.183	47.2041
Singapore	3	1	33.3333	33.3333	40.0857	37.8197	42.0788	43.2959	40.5677	37.6114	46.4781	41.5427	48.1094	61.9208	47.4472
South Sudan	11	1	9.09091	9.09091	11.5668	10.9128	12.5292	13.4628	12.9397	12.7547	13.8701	12.1834	18.2182	18.5148	17.0893
Suriname	7	1	14.2857	14.2857	17.3382	16.5834	17.1391	18.94	19.8518	20.7975	21.8066	19.9497	21.4333	23.4088	24.3853

## Sheet: Notes
Table S1 shows the % of primate species threatened with extinction currently (2016) and under six future scenarios for 2050 and 2100.
Table S2 shows the % of total number of primate species threatened with extinction due to 10 human land use types under current and six future scenarios for 2050 and 2100.
The 10 human land uses comprise secondary (regenerating) forest (sedf), secondary non-forest vegetation (secdn),
two grazing (pasture, rangeland), one urban, and five cropland (C3 annual, C3 permanent,
C4 annual, C4 permanent, and C3 nitrogen fixing crops) uses. C3 and C4 correspond to temperate
(cool) season crops and tropical (warm) season crops, respectively
Each RCP describes
an alternative future climate scenario with a specific radiative forcing (global warming) target (e.g., 2.6, 3.4, 4.5, 6.0,
or 8.5 W/m2) to be reached by the end of the century through the adoption of mitigation efforts.
Radiative forcing under each scenario is often considered as a proxy for the expected amount of
atmospheric warming.
The SSPs are described as follows:
The SSP-1 (sustainability—taking the green road) scenario represents a world shifting towards a more
sustainable path, characterized by healthy diets, low waste, reduced meat consumption, increasing
crop yields, reduced tropical deforestation, and high trade, which, together collectively “respects the
environmental boundaries”.
SSP-2 is a business-as-usual (middle of the road scenario) scenario characterized by development
along historical patterns such that meat and food consumption converge slowly towards high levels,
trade is largely regionalized, and crop yields in low-income regions catch up with high-income nations,
but the land use change is incompletely regulated, with continued tropical deforestation (although at
declining rates).
The SSP-3 (regional rivalry—a rocky road) scenario represents a world with resurgent nationalism,
increased focus on domestic issues, almost no land use change regulations, stagnant crop yields due
to limited technology transfer to developing countries, and prevalence of unhealthy diets with high
shares of animal-based products and high food waste.
In SSP-4 (inequality—a road divided), the disparities increase both across and within countries such
that high-income nations have strong land use change regulations and high crop yields, while the
low-income nations remain relatively unproductive with continued clearing of natural vegetation.
Rich elites have high consumption levels, while others have low consumption levels.
The SSP-5 (fossil fueled development—taking the highway) scenario is characterized by rapid
technological progress, increasing crop yields, global trade, and competitive markets, where unhealthy
diets and high food waste prevail. There are medium levels of land use change regulations in place,
meaning that tropical deforestation continues, although its rate declines over time.
see Chaudhary & Mooers (2018) for details.
