# Supplementary figures and images for: Expanding global commodities trade and consumption place the world’s primates at risk of extinction
Source: PeerJ journal article supplement (doi:10.7717/peerj.7068), 2019-06-17

**Fig. S1.**

**A**

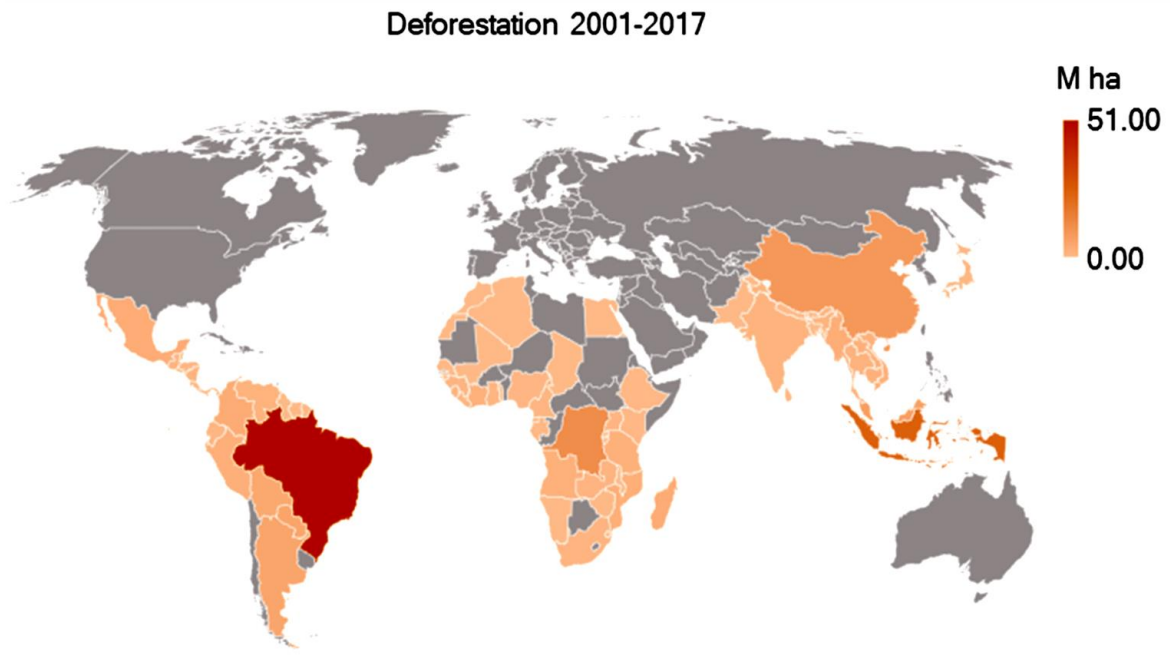

**% commodity-driven deforestation 2001-2015**

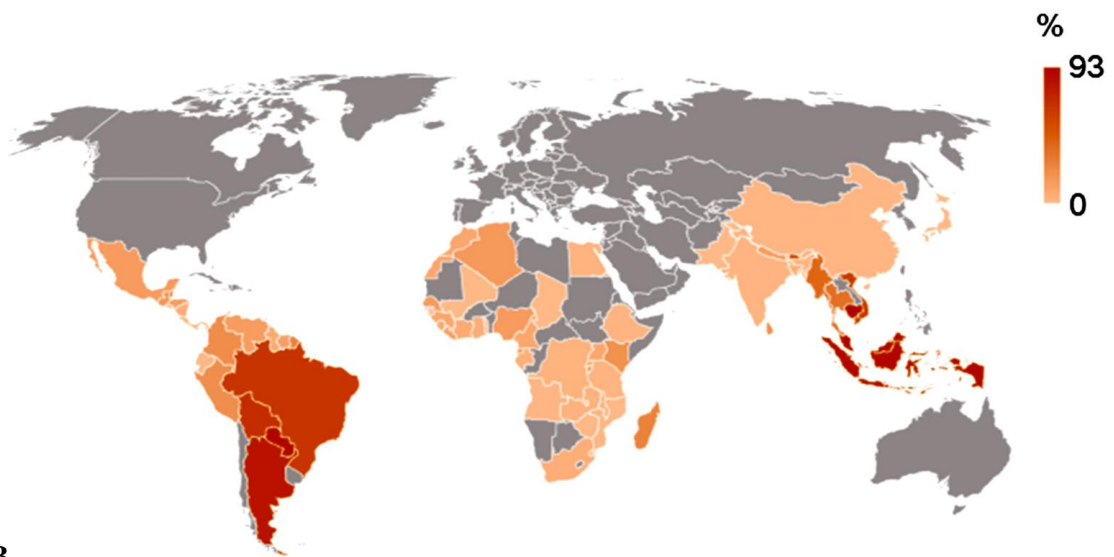

**B**

Supplement: SUPPLEMENTARY_FIG_1.pdf [file SUPPLEMENTARY_FIG_1.pdf]
